# Supplementary material for: Deciphering the Preference and Predicting the Viability of Circular Permutations in Proteins
Source: PubMed Central journal article supplement (PMC3281007; doi:10.1371/journal.pone.0031791), 2012-02-16
Supplement: pone.0031791.s006.pdf [file pone.0031791.s006.pdf]

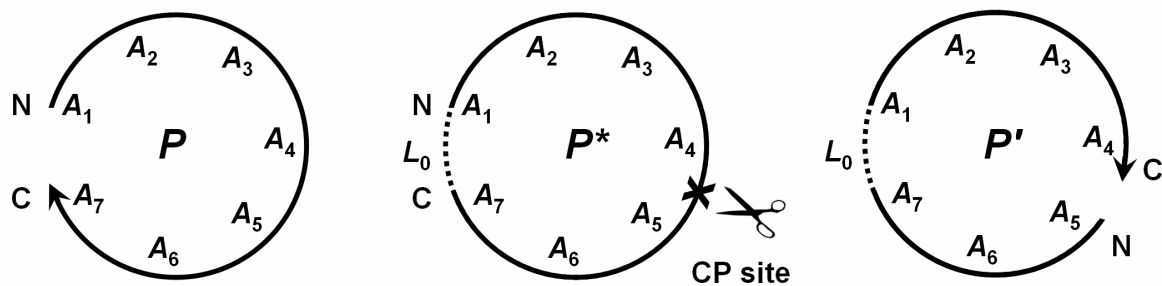

**Figure S1. Definition of a CP site.** A CP can be visualized as if the native amino (N)- and carboxyl (C)-termini of a protein  $P$  were linked ( $P^*$ ) and new ones were created elsewhere ( $P'$ ), resulting a pair of homologs with different locations of termini (*e.g.*,  $P$  versus  $P'$ ). A polypeptide linker ( $L_0$ ) may be required to connect the native termini, especially when the termini are distant from each other. A CP site of a protein is defined as a position at which the “cleavage event” occurs; it can be computed as the residue that corresponds to the N-terminal residue of a permutant. In this example, since the residue  $A_5$  of  $P$  corresponds to the N-terminal residue of  $P'$ , it is the CP site for generating  $P'$  from  $P$ . Note that this figure is a simple illustration of the working definition of a CP site rather than the evolutionary mechanism of CP or an actual artificial procedure for creating a circular permutant. The mechanisms underlying natural CP are not fully understood. Although posttranslational modification may promote CP (see [1] and [Nature (1985) 313: 64-67]), the majority of CPs may result from complex genetic events, such as the proposed duplication/deletion [2,3], fusion/fission [4,5] and other models (see [29] for a summary). See [8,11,25,75,76,77,78,79] for wet-lab protocols for generating artificial circular permutants.
