# Supplementary material for: Deciphering the Preference and Predicting the Viability of Circular Permutations in Proteins
Source: PubMed Central journal article supplement (PMC3281007; doi:10.1371/journal.pone.0031791), 2012-02-16
Supplement: pone.0031791.s007.pdf [file pone.0031791.s007.pdf]

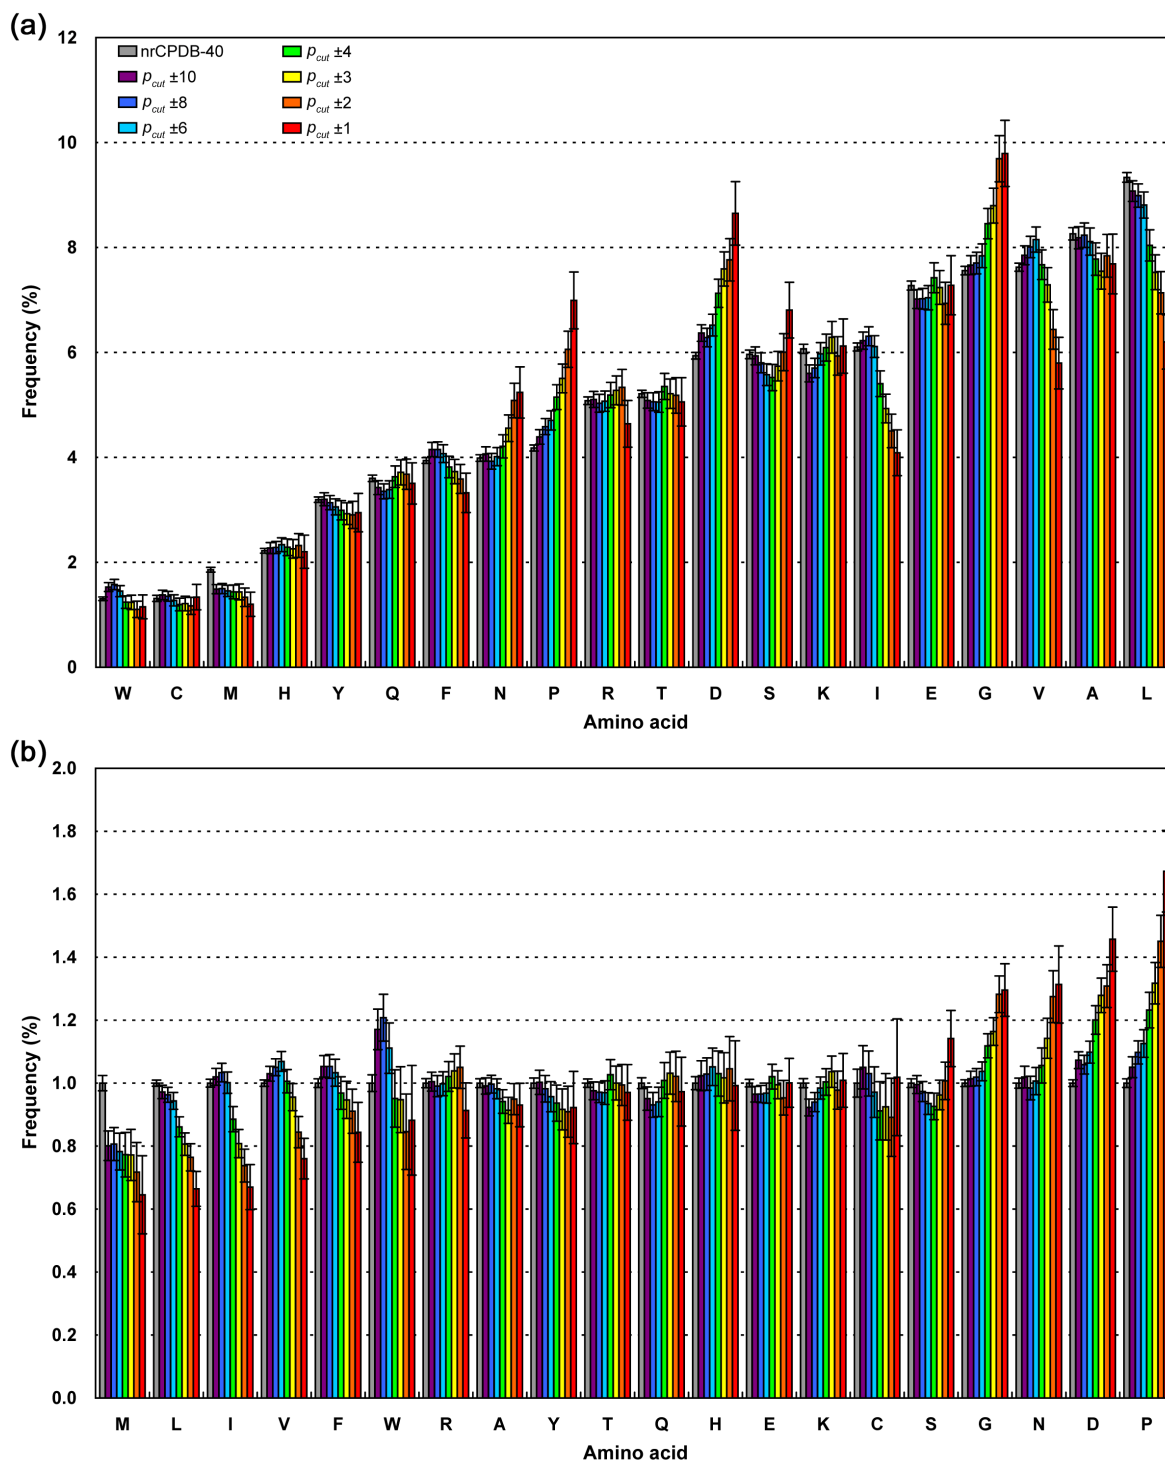

**Figure S2. Amino acid compositions of viable CP sites and background protein sequences.**

In this experiment, protein sequences of nrCPDB-40 were utilized as the “background group” (gray bars). CP site representative sequences of nrCPsite<sub>cpdb-40</sub> with lengths varied from 20 ( $\pm 10$ ) to 2 ( $\pm 1$ ) residues were the “CP site groups”. CP site groups are colored with the colors of a rainbow; a warmer color (*i.e.*, closer to red) represents a shorter CP site representative sequence, which covers a smaller section around the CP cleavage point ( $p_{cut}$ ). **(a)** Absolute occurrence frequency values for 20 amino acids. **(b)** Relative frequency values with respect to the background for 20 amino acids. The error bars represent standard deviations computed by using a random resampling technique known as bootstrap (see **Materials and Methods**). These results indicate that certain amino acids have increasingly different occurrence frequencies from the background at positions increasingly close to the CP site.
