# Supplementary material for: Deciphering the Preference and Predicting the Viability of Circular Permutations in Proteins
Source: PubMed Central journal article supplement (PMC3281007; doi:10.1371/journal.pone.0031791), 2012-02-16
Supplement: pone.0031791.s008.pdf [file pone.0031791.s008.pdf]

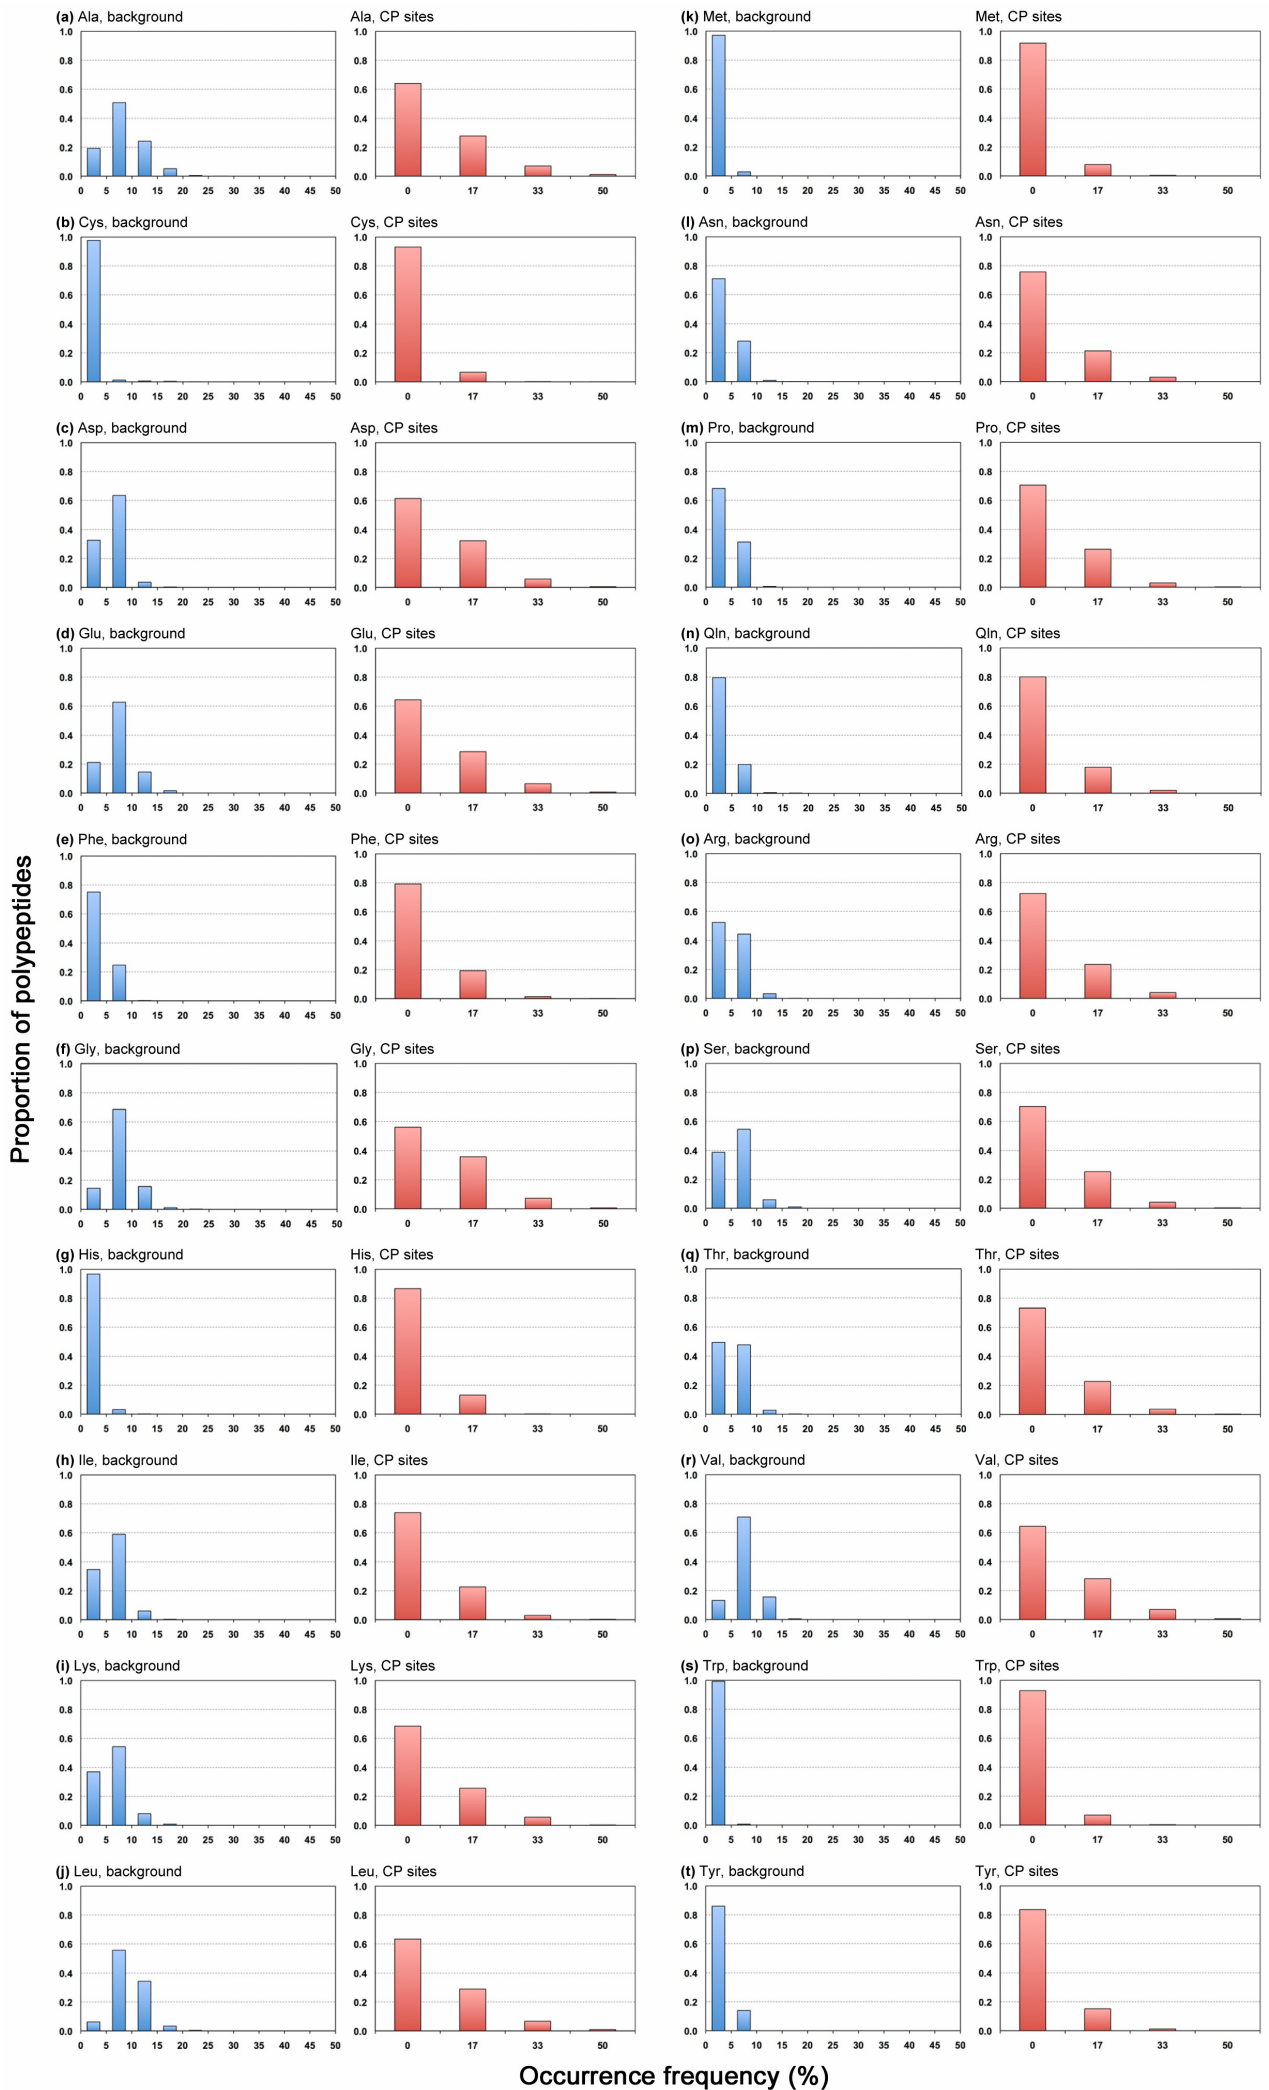

**Figure S3. Distribution of occurrence frequencies for 20 amino acids.** This figure demonstrates the non-normal distribution of occurrence frequencies of each amino acid. The background group (nrCPDB-40; blue bars) and CP site groups (nrCPsite<sub>cpdb</sub>-40,  $p_{cut} \pm 3$ ; red bars) were the same as those used in Figure S2. In each diagram, the  $x$  axis represents the occurrence frequency of a specific amino acid in a polypeptide, and the  $y$  axis represents the proportion of polypeptides that possessing a certain occurrence frequency of the amino acid. For instance, The first blue bar in diagram (a) indicates that there were 20% (*i.e.*, 0.2) of all polypeptides in the background group that possessed 0% – 5% Ala residues. The distributions of the CP site groups are all skewed to the left and clearly non-normal. Although some amino acids, *e.g.*, Ala and Gly, have a visually more normal distribution than the CP site groups do, most amino acids still have very skewed distributions. To determine the significance of difference between samples with non-normal distribution(s), the traditional t-test is inadequate; instead, we performed the permutation test (see **Materials and Methods**).
