# Supplementary material for: Deciphering the Preference and Predicting the Viability of Circular Permutations in Proteins
Source: PubMed Central journal article supplement (PMC3281007; doi:10.1371/journal.pone.0031791), 2012-02-16
Supplement: pone.0031791.s009.pdf [file pone.0031791.s009.pdf]

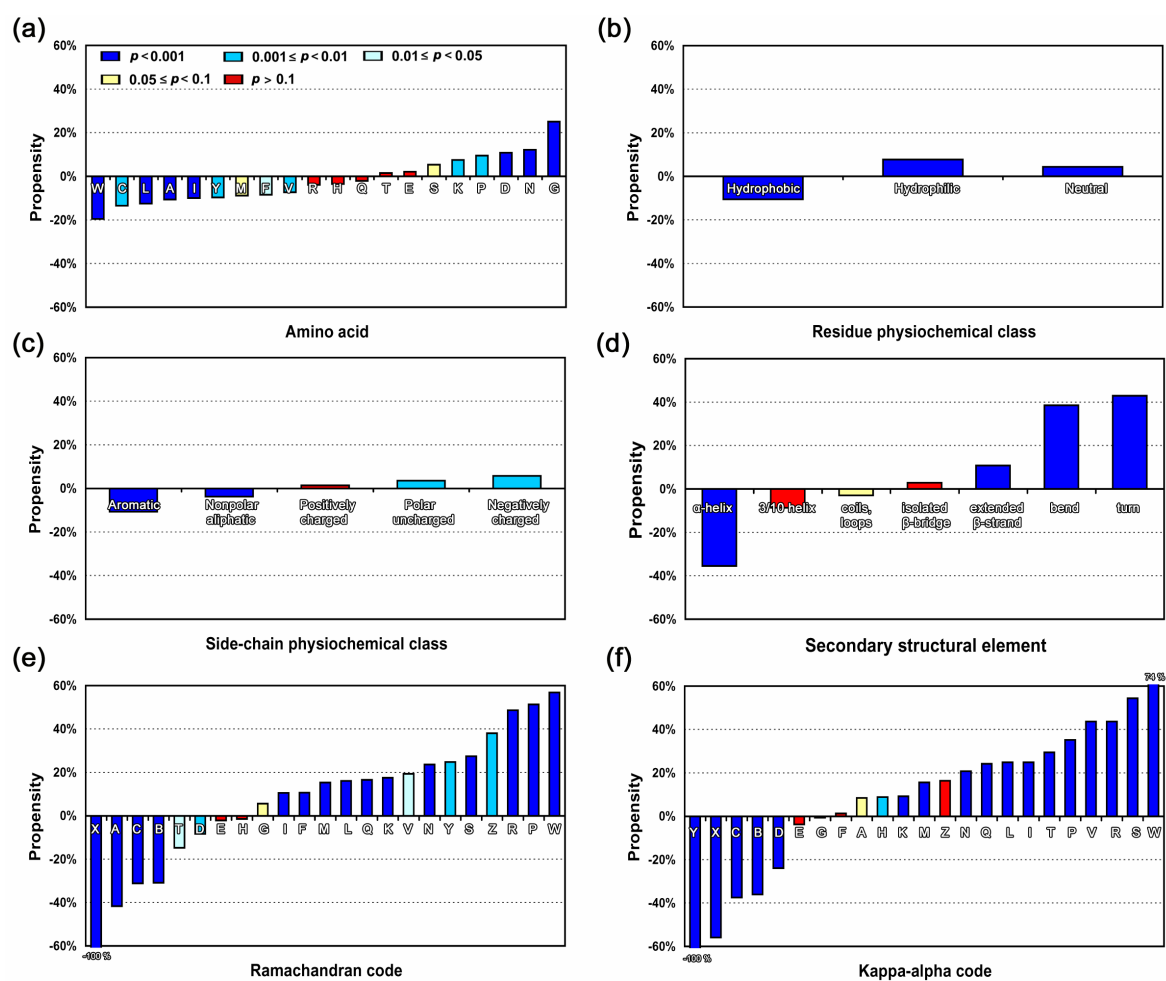

**Figure S4. Sequence and secondary structural propensities of viable CP sites in the nrGIS-40 dataset.** Similar to those in Figure 1, in these charts, each bar shows the relative occurrence of a pattern for the background polypeptides and viable CP sites; but, the background and CP site groups utilized here are nrGIS-40 and nrCPsite<sub>gis-40</sub>, respectively. The background value was considered as the zero point in each experiment. Dark blue- to light blue-colored bars represent smaller  $p$ -values ( $<0.05$ ) for the difference between the background and CP site groups. The yellow- and red-colored bars represent  $p$ -values  $\geq 0.05$ . The  $p$ -values were calculated by permutation test. Patterns examined in this experiment include: **(a)** amino acids, **(b)** residue physiochemical types classified according to [34], **(c)** side-chain physiochemical types classified according to [35], **(d)** SSE determined by DSSP [45], **(e)** Ramachandran code, the backbone conformational alphabet defined by SARST [46], and **(f)** kappa-alpha code, the backbone conformational alphabet defined by 3D-BLAST [47].
