# Supplementary material for: Deciphering the Preference and Predicting the Viability of Circular Permutations in Proteins
Source: PubMed Central journal article supplement (PMC3281007; doi:10.1371/journal.pone.0031791), 2012-02-16
Supplement: pone.0031791.s010.pdf [file pone.0031791.s010.pdf]

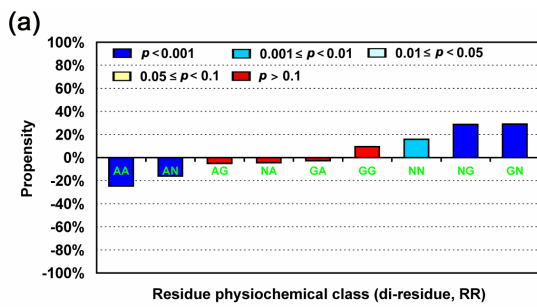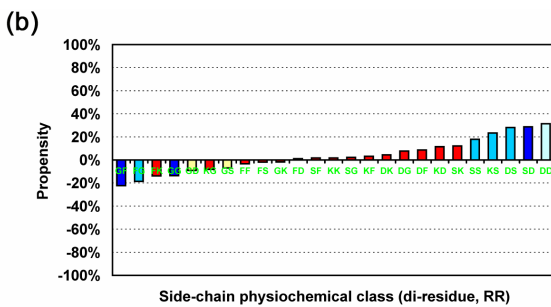

**Figure S5. Propensities of viable CP sites for di-residue, oligo-residue, and residue coupling patterns.** The background and CP site groups of these experiments are nrCPDB-40 and nrCPsite<sub>cpdb</sub>-40, respectively. The color codes shown in (a) for *p*-values are the same as those of Figure 1. In each chart, the label for the *x* axis indicates the type of pattern under analysis. An R stands for a residue at a position of interest, whereas an x stands for a residue at an uninterested (*i.e.*, to be skipped) position. For example, given an amino acid sequence ARTOFCP, the elements extracted from this sequence that match the pattern RxxR include: AxxO, RxxF, TxxC and OxxP. The fundamental elements used in the experiments for (a), (d), (e), (f), (i) and (l) are the residue physiochemical types classified according to [34]; elements for (b), (g), (j) and (m) are the side-chain physiochemical types classified according to [35]; elements for (c), (h), (k) and (n) are the SSE codes defined by DSSP [45]. Compared with single-residue patterns (Figure 1 and S4), the occurrence frequencies of these di/oligo-residue and residue coupling patterns show larger differences from the background. A lot of information can be extracted from these results. Take (c) for instance. If we consider SSE codes H ( $\alpha$ -helix), G (3/10 helix) and I ( $\pi$ -helix) as helices, E (extended strand participating in  $\beta$ -ladder) and B (isolated  $\beta$ -bridge, which forms a single pair  $\beta$ -sheet hydrogen bond) as strands, and T (turn), S (bend) and C (others) as less-regular SSEs, then most of the di-residue SSE patterns (see (c)) that has occurrence frequencies 50% higher than the background represent conformations of the terminal residues of a helix or a strand, such as SE (bend-to-strand), GE (helix-to-strand), TE (turn-to-helix), GS (helix-to-bend) and HC (helix-to-coil). These facts imply that CP tends to occur at the transitional regions between two different regular SSEs (helix/strand), or between a regular SSE and a less-regular conformation.
